# Supplementary material for: Layered rare-earth hydroxides as multi-modal medical imaging probes: particle size optimisation and compositional exploration
Source: Dalton Trans. 2024 Apr 19;53(19):8429–42. doi: 10.1039/d4dt00371c (PMC11091857; doi:10.1039/d4dt00371c)
Supplement: DT-053-D4DT00371C-s001 [file DT-053-D4DT00371C-s001.pdf]

**Layered rare-earth hydroxides as multi-modal medical imaging probes: particle size optimisation and compositional exploration**

Margarita Strimaite,<sup>a,b</sup> Connor J. R. Wells,<sup>c</sup> Timothy J. Prior,<sup>d</sup> Daniel J. Stuckey,<sup>b</sup> Jack A. Wells,<sup>b</sup> Gemma L. Davies,<sup>c,e\*</sup> Gareth R. Williams<sup>a\*</sup>

<sup>a</sup> UCL School of Pharmacy, University College London, 29-39 Brunswick Square, London, WC1N 1AX, UK

<sup>b</sup> UCL Centre for Advanced Biomedical Imaging, University College London, 72 Huntley Street, London, WC1E 6DD, UK

<sup>c</sup> Department of Chemistry, University College London, 20 Gordon Street, London, WC1H 0AJ, UK

<sup>d</sup> Chemistry, School of Natural Sciences, University of Hull, Kingston Upon Hull, HU6 7RX, UK

<sup>e</sup> School of Chemistry, University of Birmingham, Edgbaston, Birmingham, B15 2TT, UK

\* authors for correspondence. Email: [g.davies.7@bham.ac.uk](mailto:g.davies.7@bham.ac.uk) (GLD); [g.williams@ucl.ac.uk](mailto:g.williams@ucl.ac.uk) (GRW)

## Particle size optimisation

Table S1 Summary of reaction parameters generated using the JMP Pro 14 software, and precursor solution volumes for all samples. Sample names are designated as T-X-Y-Z, where T = temperature during synthesis, X = incubation time, and Y = fill volume, and Z = replicate number (if applicable).

| Sample name | Temperature (°C) | Incubation time (h) | Total Volume (ml) | Volume of TbCl <sub>3</sub> ·6H <sub>2</sub> O solution (ml) | Volume of NaCl/NaOH solution (ml) |
|-------------|------------------|---------------------|-------------------|--------------------------------------------------------------|-----------------------------------|
| 90-8-10     | 90               | 8                   | 10                | 7.5                                                          | 2.5                               |
| 90-4-18-1   | 90               | 4                   | 18                | 13.5                                                         | 4.5                               |
| 90-4-18-2   | 90               | 4                   | 18                | 13.5                                                         | 4.5                               |
| 90-4-18-3   | 90               | 4                   | 18                | 13.5                                                         | 4.5                               |
| 90-4-18-4   | 90               | 4                   | 18                | 13.5                                                         | 4.5                               |
| 90-4-18-5   | 90               | 4                   | 18                | 13.5                                                         | 4.5                               |
| 90-4-18-6   | 90               | 4                   | 18                | 13.5                                                         | 4.5                               |
| 100-10-10   | 100              | 10                  | 10                | 7.5                                                          | 2.5                               |
| 100-10-18   | 100              | 10                  | 18                | 13.5                                                         | 4.5                               |
| 100-24-10   | 100              | 24                  | 10                | 7.5                                                          | 2.5                               |
| 100-24-18   | 100              | 24                  | 18                | 13.5                                                         | 4.5                               |
| 140-4-10    | 140              | 4                   | 10                | 7.5                                                          | 2.5                               |
| 140-8-18    | 140              | 8                   | 18                | 13.5                                                         | 4.5                               |
| 200-10-10   | 200              | 10                  | 10                | 7.5                                                          | 2.5                               |
| 200-10-18   | 200              | 10                  | 18                | 13.5                                                         | 4.5                               |
| 200-24-10   | 200              | 24                  | 10                | 7.5                                                          | 2.5                               |
| 200-24-18   | 200              | 24                  | 18                | 13.5                                                         | 4.5                               |

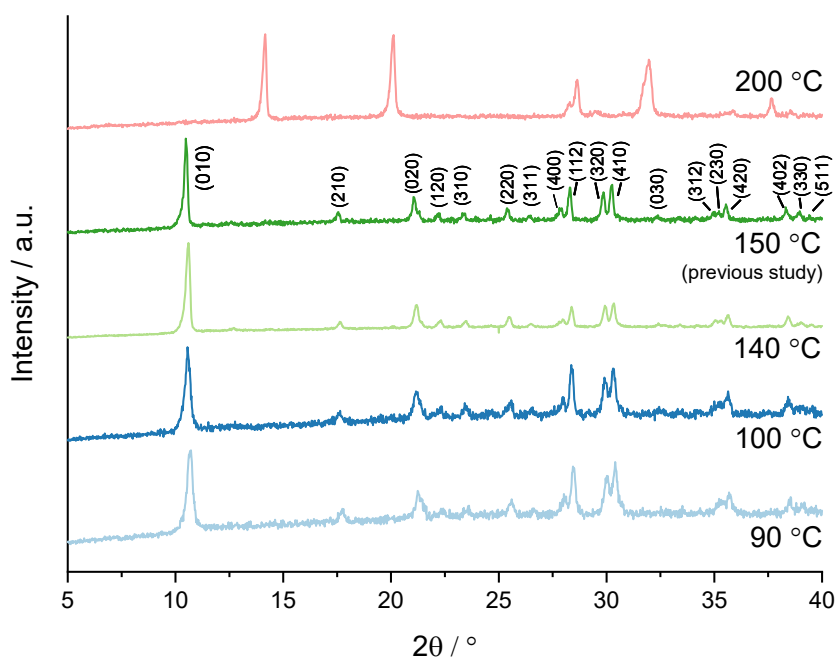

Figure S1 Representative XRD patterns for LTbH synthesised according to the previously reported method (at 150 °C),<sup>1</sup> and at 90, 100, and 140 °C; attempted LTbH synthesis at 200 °C yielded an orthorhombic Tb(OH)<sub>2</sub>Cl phase. The LTbH system is indexed to the orthorhombic Pca<sub>21</sub> space group.

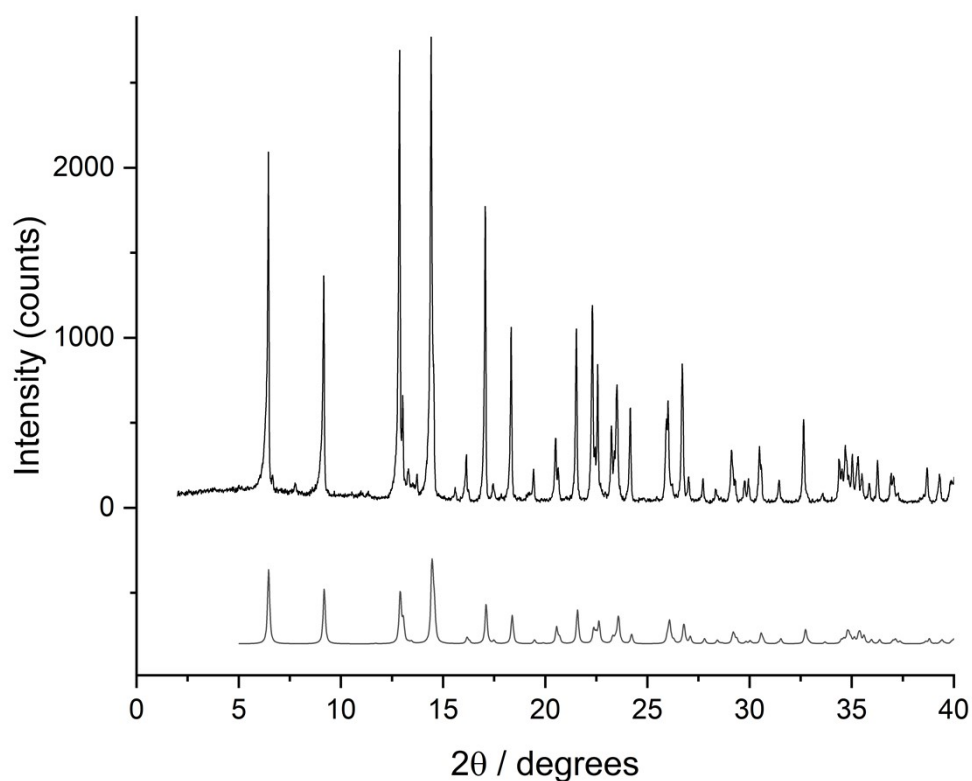

Figure S2 Observed X-ray diffraction pattern for phase obtained at 200 °C (above), and simulated pattern for Pnma Tb(OH)<sub>2</sub>Cl based on the prototype Lu(OH)<sub>2</sub>Cl (below). Observed and simulated patterns are for Mo Kα1 radiation. The phase obtained at 200 °C can be indexed using the primitive orthorhombic cell  $a = 12.6008(6) \text{ \AA}$ ,  $b = 3.6638(2) \text{ \AA}$ ,  $c = 6.2506(3) \text{ \AA}$ . This is consistent with the Pnma phases Ln(OH)<sub>2</sub>Cl (Ln = Tm, Yb, Lu) reported previously.<sup>2</sup> This previous report identified a monoclinic form of Ln(OH)<sub>2</sub>Cl, but it is clear that a second form exists, orthorhombic Ln(OH)<sub>2</sub>Cl.

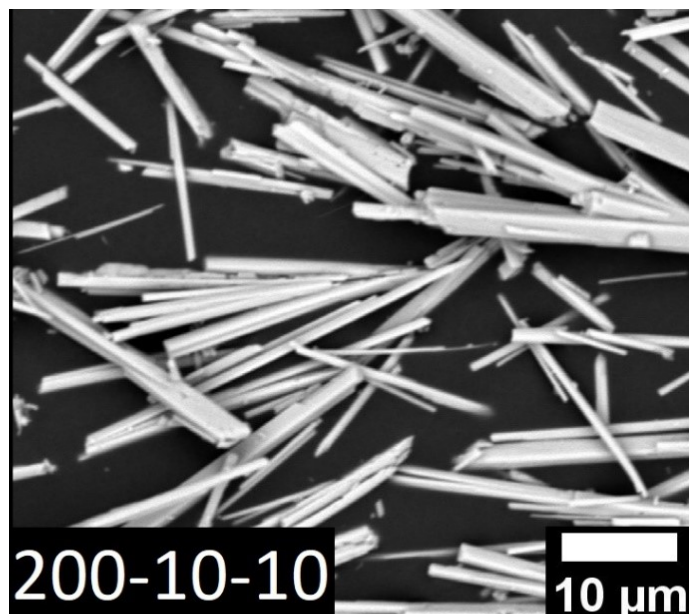

Figure S3 SEM image of orthorhombic Tb(OH)<sub>2</sub>Cl phase produced when attempting LTbH-Cl synthesis at 200 °C

Table S2 Summary of average particle sizes from SEM images, hydrodynamic diameters, and polydispersity indexes of materials made under different conditions. Note: none of the above were measured for samples synthesised at 200 °C, as material morphology was not suitable for theranostic applications. Hydrodynamic diameter and polydispersity measurements were conducted only for size-optimised samples.

| Sample name | Size by SEM (nm) | Particles measured | Hydrodynamic diameter (nm) | Polydispersity index |
|-------------|------------------|--------------------|----------------------------|----------------------|
| 90-8-10     | 206 ± 80         | 293                | n/a                        | n/a                  |
| 90-4-18-1   | 162 ± 85         | 460                | 199 ± 3                    | 0.15 ± 0.04          |
| 90-4-18-2   | 151 ± 56         | 472                | 196 ± 2                    | 0.18 ± 0.02          |
| 90-4-18-3   | 159 ± 52         | 515                | 199 ± 2                    | 0.17 ± 0.03          |
| 90-4-18-4   | 146 ± 49         | 398                | 194 ± 6                    | 0.15 ± 0.05          |
| 90-4-18-5   | 147 ± 47         | 849                | 194 ± 1                    | 0.18 ± 0.04          |
| 90-4-18-6   | 152 ± 61         | 840                | 201 ± 2                    | 0.20 ± 0.02          |
| 100-10-10   | 293 ± 126        | 391                | n/a                        | n/a                  |
| 100-10-18   | 308 ± 128        | 246                | n/a                        | n/a                  |
| 100-24-10   | 307 ± 127        | 247                | n/a                        | n/a                  |
| 100-24-18   | 344 ± 130        | 205                | n/a                        | n/a                  |
| 140-4-10    | 312 ± 135        | 251                | n/a                        | n/a                  |
| 140-8-18    | 413 ± 209        | 227                | n/a                        | n/a                  |
| 200-10-10   | n/a              | n/a                | n/a                        | n/a                  |
| 200-10-18   | n/a              | n/a                | n/a                        | n/a                  |
| 200-24-10   | n/a              | n/a                | n/a                        | n/a                  |
| 200-24-18   | n/a              | n/a                | n/a                        | n/a                  |

Table S3 Statistical analysis of the particle sizes measured by SEM. One-way analysis of variance (ANOVA) was used to determine the statistical significance (at the  $p = 0.05$  level) in the difference of means for particle size measurements. A Fisher's LSD (if sample means had unequal variance) post hoc test was used to determine which sample means differed significantly. Samples which share a group number are not statistically different. \* Data from previously published work.<sup>1</sup>

| Sample         | Mean particle size (nm) | Groups of statistical equivalence |   |          |   |   |   |
|----------------|-------------------------|-----------------------------------|---|----------|---|---|---|
| Previous work* | 670                     | 1                                 |   |          |   |   |   |
| 90-8-10        | 206                     |                                   | 2 |          |   |   |   |
| 90-4-18-1      | <b>162</b>              |                                   |   | <b>3</b> |   |   |   |
| 90-4-18-2      | <b>151</b>              |                                   |   | <b>3</b> |   |   |   |
| 90-4-18-3      | <b>159</b>              |                                   |   | <b>3</b> |   |   |   |
| 90-4-18-4      | <b>146</b>              |                                   |   | <b>3</b> |   |   |   |
| 90-4-18-5      | <b>147</b>              |                                   |   | <b>3</b> |   |   |   |
| 90-4-18-6      | <b>152</b>              |                                   |   | <b>3</b> |   |   |   |
| 100-10-10      | 293                     |                                   |   |          | 4 |   |   |
| 100-10-18      | 308                     |                                   |   |          | 4 | 5 |   |
| 100-24-10      | 307                     |                                   |   |          | 4 | 5 |   |
| 100-24-18      | 344                     |                                   |   |          |   | 5 |   |
| 140-4-10       | 312                     |                                   |   |          | 4 | 5 |   |
| 140-8-18       | 413                     |                                   |   |          |   |   | 6 |

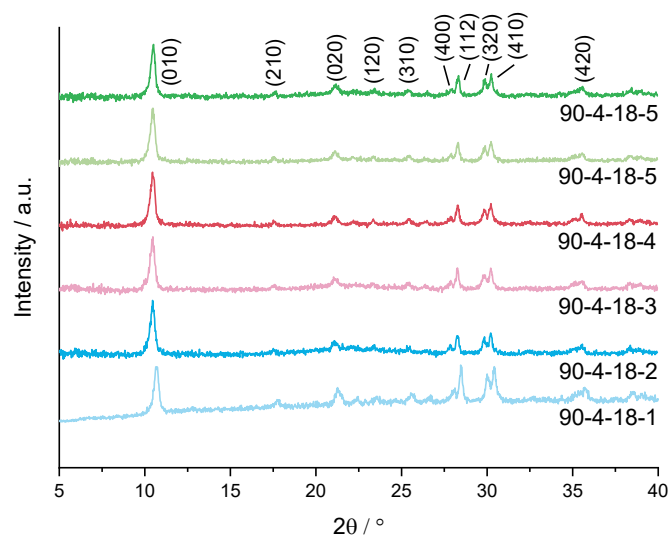

Figure S4 XRD patterns for the replicates of LTbH synthesised at the optimised conditions (90 °C, 4-hour incubation time, 18 ml fill volume). The LTbH system is indexed to the orthorhombic  $Pca2_1$  space group.

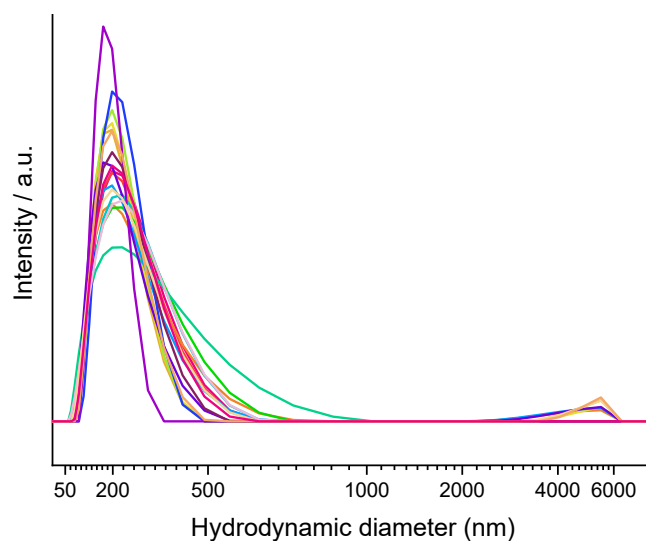

Figure S5 Superimposed hydrodynamic diameter data from DLS experiments on all size-optimised LTbH samples (each sample suspension was prepared once and measured in triplicate).

## Application of optimised synthetic method to other LRHs (R = Pr, Nd, Gd, Dy, Er, Yb)

Table S4 A summary of (010) reflection positions and refined unit cell parameters of LRH materials. (R = Pr, Nd, Gd, Dy, Er, Yb). Note: LYbH was not phase pure, data shown is for most abundant phase.

| Material | 2 $\theta$ / ° | a / Å            | b / Å           | c / Å            |
|----------|----------------|------------------|-----------------|------------------|
| LPrH     | 10.24          | 12.49 $\pm$ 0.02 | 8.60 $\pm$ 0.01 | 7.14 $\pm$ 0.01  |
| LNdH     | 10.24          | 12.54 $\pm$ 0.02 | 8.70 $\pm$ 0.01 | 7.02 $\pm$ 0.02  |
| LGdH     | 10.50          | 12.71 $\pm$ 0.02 | 8.42 $\pm$ 0.01 | 7.047 $\pm$ 0.01 |
| LDyH     | 10.52          | 12.52 $\pm$ 0.02 | 8.37 $\pm$ 0.02 | 7.05 $\pm$ 0.02  |
| LErH     | 10.58          | 12.60 $\pm$ 0.01 | 8.41 $\pm$ 0.00 | 7.12 $\pm$ 0.00  |
| LYbH     | 10.58          | 12.56 $\pm$ 0.03 | 8.38 $\pm$ 0.01 | 7.02 $\pm$ 0.03  |

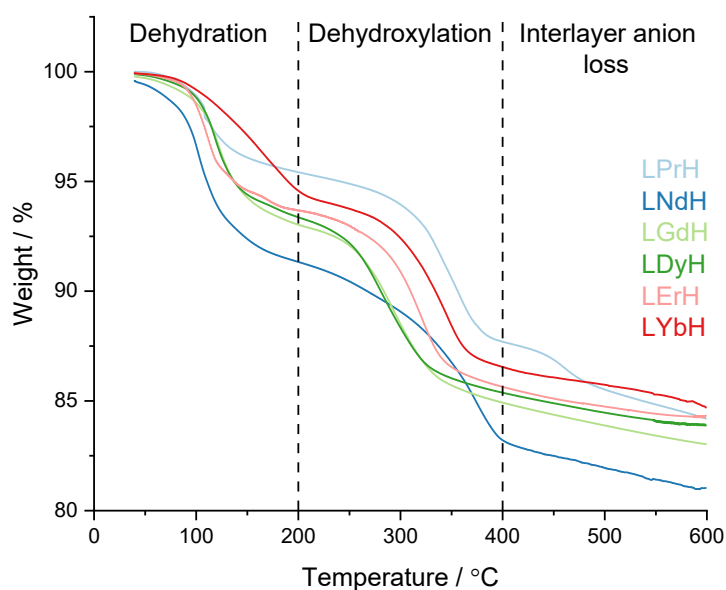

Figure S6 Thermograms of the various LRH materials (R = Pr, Nd, Gd, Dy, Er, Yb).

Table S5 Summary of observed (and calculated) values for elemental analysis and TGA data.

| Material | %C          | %H          | Mass loss % (H <sub>2</sub> O) |
|----------|-------------|-------------|--------------------------------|
| LPrH-Cl  | 1.24 (1.30) | 1.53 (1.70) | 4.77 (4.34)                    |
| LNdH-Cl  | 1.22 (1.24) | 1.77 (1.97) | 8.15 (7.24)                    |
| LGdH-Cl  | 0.42 (0.39) | 1.59 (1.84) | 6.83 (6.78)                    |
| LDyH-Cl  | 0.44 (0.39) | 1.56 (1.53) | 6.45 (5.74)                    |
| LErH-Cl  | 0.24 (0.25) | 1.64 (1.68) | 6.35 (5.62)                    |
| LYbH-Cl  | 0.07 (0.06) | 1.63 (1.63) | 6.03 (5.48)                    |

## Application of optimised synthetic method to generate mixed Gd/Tb LRH systems

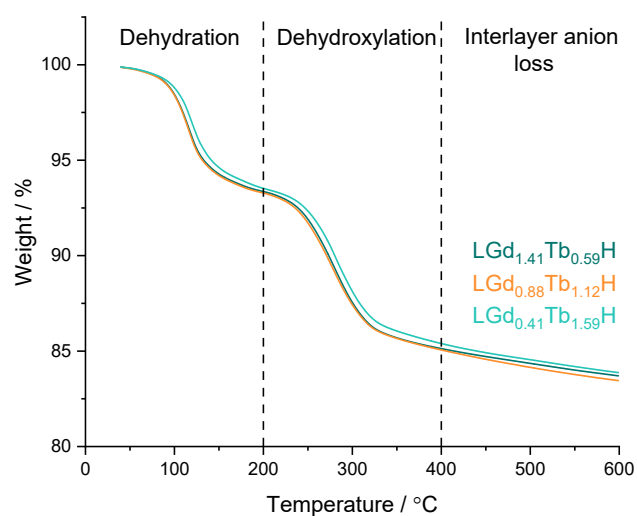

Figure S7 Thermograms of mixed LRH materials with varying composition ( $R = \text{Gd/Tb}$ ).

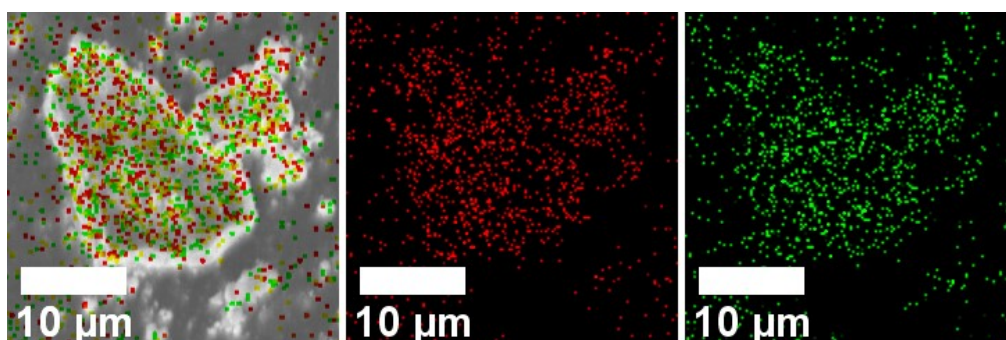

Figure S8 Representative SEM image used for EDXS analysis (sample  $\text{LGd}_{1.41}\text{Tb}_{0.59}\text{H-Cl}$ ). Gadolinium and terbium atoms detected are shown in red and green respectively; yellow indicates sites which are either Gd or Tb.

Table S6 Summary of observed (and calculated) values for elemental analysis and TGA data.

| Sample                                         | % C         | % H         | Mass loss % ( $\text{H}_2\text{O}$ ) |
|------------------------------------------------|-------------|-------------|--------------------------------------|
| $\text{LGd}_{1.41}\text{Tb}_{0.59}\text{H-Cl}$ | 0.30 (0.28) | 1.62 (1.78) | 6.14 (6.22)                          |
| $\text{LGd}_{0.88}\text{Tb}_{1.12}\text{H-Cl}$ | 0.30 (0.28) | 1.60 (1.78) | 6.18 (6.21)                          |
| $\text{LGd}_{0.41}\text{Tb}_{1.59}\text{H-Cl}$ | 0.35 (0.32) | 1.58 (1.74) | 5.94 (5.83)                          |

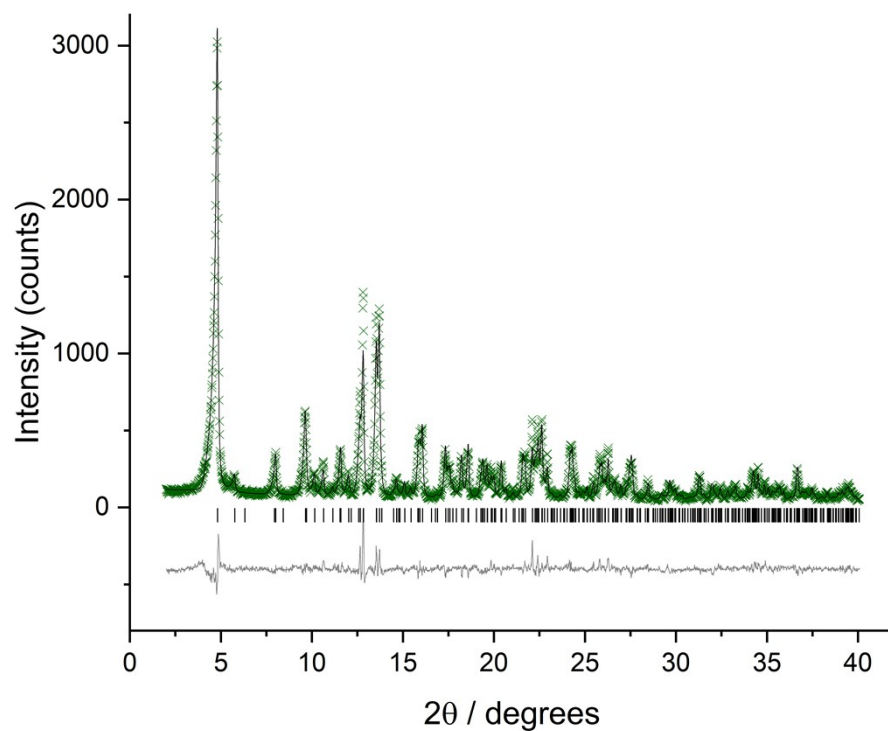

Figure S9 Observed (crosses), calculated (upper line), and difference (lower line) profiles for Rietveld refinement of LGdH-Cl. Tick marks show the positions of allowed reflections.

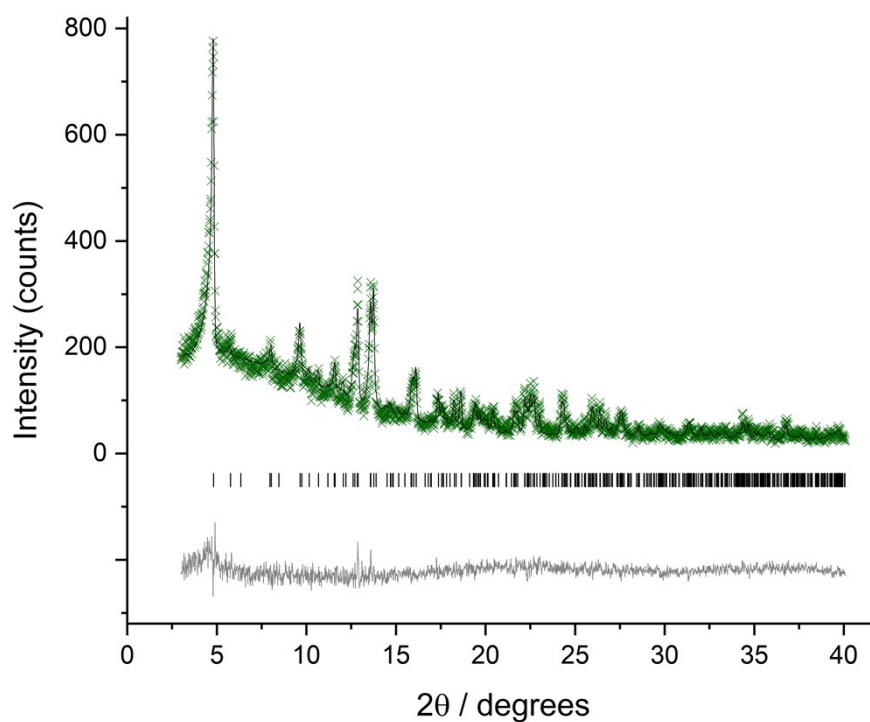

Figure S10 Observed (crosses), calculated (upper line), and difference (lower line) profiles for Rietveld refinement of LTbH-Cl. Tick marks show the positions of allowed reflections.

Table S7 Rietveld refinement details for LGdH-Cl, LGd<sub>1.41</sub>Tb<sub>0.59</sub>H-Cl, and LTbH-Cl. The initial model employed was the structure of layered ytterbium hydroxychloride, LYbH-Cl (ICSD No. 419745).<sup>3</sup>

|                                                |                                                                             |            |           |                    |
|------------------------------------------------|-----------------------------------------------------------------------------|------------|-----------|--------------------|
|                                                | Orthorhombic, space group <i>Pca</i> 2 <sub>1</sub>                         |            |           |                    |
| <b>LGdH-Cl</b>                                 | 2540 points, 23 parameters, $\chi^2 = 1.44$ , R(F) = 4.33 %, Rwp = 11.07 %  |            |           |                    |
|                                                | a / Å                                                                       | b / Å      | c / Å     | V / Å <sup>3</sup> |
|                                                | 12.8648(8)                                                                  | 8.4310(5)  | 7.2934(4) | 791.06(6)          |
| <b>LGd<sub>1.41</sub>Tb<sub>0.59</sub>H-Cl</b> | 2540 points, 23 parameters, $\chi^2 = 1.44$ , R(F) = 5.16 %, Rwp = 10.69 %  |            |           |                    |
|                                                | a / Å                                                                       | b / Å      | c / Å     | V / Å <sup>3</sup> |
|                                                | 12.8043(7)                                                                  | 8.4191(4)  | 7.2571(3) | 782.32(5)          |
| <b>LTbH-Cl</b>                                 | 2473 points, 17 parameters, $\chi^2 = 1.14$ , R(F) = 11.95 %, Rwp = 11.95 % |            |           |                    |
|                                                | a / Å                                                                       | b / Å      | c / Å     | V / Å <sup>3</sup> |
|                                                | 12.8150(19)                                                                 | 8.4288(12) | 7.2625(9) | 784.47(15)         |

$$\chi^2 = \frac{1}{N} \sum_i \frac{(y_{c,i} - y_{o,i})^2}{\sigma^2[y_{o,i}]} \quad R(F) = \frac{\sum |F_o| - |F_c|}{\sum |F_o|} \quad Rwp = \left[ \frac{\sum_i w_i (y_{c,i} - y_{o,i})^2}{\sum_i w_i y_{o,i}^2} \right]^{1/2}$$

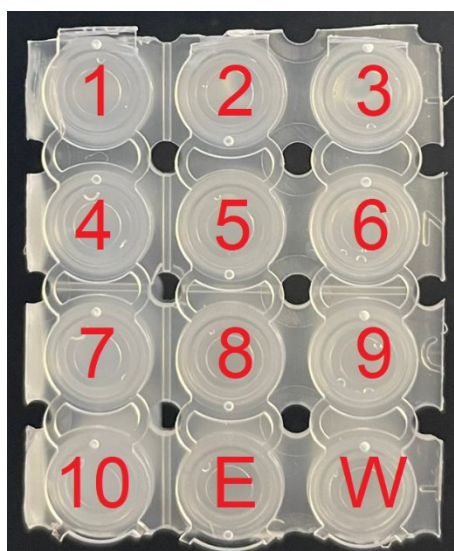

LGd<sub>1.41</sub>Tb<sub>0.59</sub>H in water

- 1 - 0.9 mg/ml
- 2 - 0.4 mg/ml
- 3 - 0.3 mg/ml
- 4 - 0.2 mg/ml
- 5 - 0.1 mg/ml
- 6 - 0.05 mg/ml
- 7 - 0.035 mg/ml
- 8 - 0.02 mg/ml
- 9 - 0.01 mg/ml
- 10 - 0.005 mg/ml
- E - empty well
- W - water only

Figure S11 Layout of MR imaging phantom consisting of a dilution series of LGd<sub>1.41</sub>Tb<sub>0.59</sub>H in water in a section of a well plate (each well is 300  $\mu$ l in volume, filled with 300  $\mu$ l of suspension at the indicated concentration (in mg/ml). Note: suspensions 8, 9, and 10 were excluded from analysis due to low signal change relative to water.

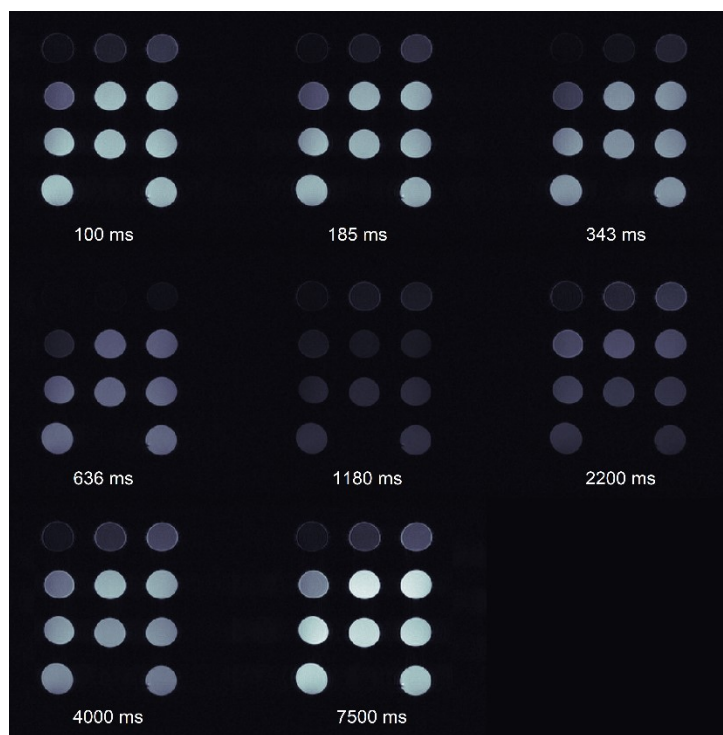

Figure S12 Representative  $T_1$ -weighted images of  $\text{LGd}_{1.41}\text{Tb}_{0.59}\text{H}$  phantom (shown in Figure S11) at various inversion times.

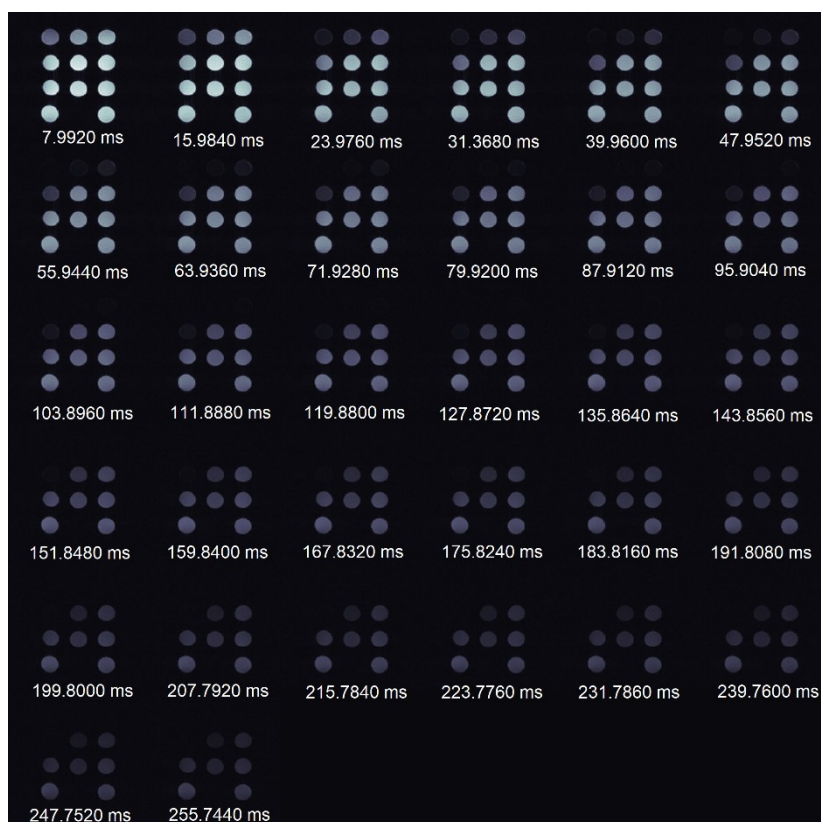

Figure S13 Representative  $T_2$ -weighted images of  $\text{LGd}_{1.41}\text{Tb}_{0.59}\text{H}$  phantom (shown in Figure S11) at various echo times.

## References

- 1.) Strimaite, M. *et al.* Layered terbium hydroxides for simultaneous drug delivery and imaging. *Dalt. Trans.* **50**, 10275–10290 (2021).
- 2.) Zehnder, R. *et al.* Investigation of the Structural Properties of an Extended Series of Lanthanide Bis-hydroxychlorides  $\text{Ln}(\text{OH})_2\text{Cl}$  ( $\text{Ln} = \text{Nd-Lu}$ , except  $\text{Pm}$  and  $\text{Sm}$ ). *Inorg. Chem.* **49**, 4781-4790 (2010).
- 3.) Poudret, L., Prior, T. J., McIntyre, L. J. & Fogg, A. M. Synthesis and crystal structures of new lanthanide hydroxyhalide anion exchange materials,  $\text{Ln}_2(\text{OH})_5\text{X} \cdot 1.5\text{H}_2\text{O}$  ( $\text{X} = \text{Cl}, \text{Br}$ ;  $\text{Ln} = \text{Y}, \text{Dy}, \text{Er}, \text{Yb}$ ). *Chemistry of Materials* **20**, 7447–7453 (2008).
